# Supplementary material for: The oxidative potential of particulate matter (PM) in different regions around the world and its relation to air pollution sources
Source: Royal Society of Chemistry journal article supplement (doi:10.1039/d2ea00043a), 2022-01-01
Supplement: d2ea00043a1.pdf [file d2ea00043a1.pdf]

Table S1. Comparison of PM mass fractions of selected components in the current study with the previous measurements in the literature at each location site.

| Study                          | PM Mass fraction ( $\mu\text{g}/\text{mg PM}$ ) |        |                 |                    |                 |        |       |       |      |      |      |      |
|--------------------------------|-------------------------------------------------|--------|-----------------|--------------------|-----------------|--------|-------|-------|------|------|------|------|
|                                | EC                                              | OC     | $\text{NO}_3^-$ | $\text{SO}_4^{2-}$ | $\text{NH}_4^+$ | Ca     | Al    | Fe    | Zn   | Ba   | Cu   | Pb   |
| <b>Athens, Greece</b>          |                                                 |        |                 |                    |                 |        |       |       |      |      |      |      |
| Current study                  | 13.36                                           | 241.64 | 3.93            | 264.17             | 69.57           | 44.54  | 18.53 | 18.76 | 1.35 | 0.45 | 0.28 | 0.26 |
| Taghvaei et al. (2019)         | 39.98                                           | 184.80 | 1.89            | 69.94              | --              | 14.22  | 9.71  | 11.45 | 1.32 | 3.50 | 1.16 | 0.77 |
| Diapouli et al. (2017)         | 38.81                                           | 211.59 | 35.34           | 247.50             | 47.62           | 67.29  | 9.48  | 21.34 | 2.91 | 0.38 | 0.62 | 0.48 |
| Amato et al. (2016)            | 29.45                                           | 247.57 | 15.72           | 262.47             | 85.70           | 15.90  | 8.18  | 10.18 | 0.90 | 0.63 | 0.20 | 0.25 |
| <b>Beirut, Lebanon</b>         |                                                 |        |                 |                    |                 |        |       |       |      |      |      |      |
| Current study                  | 10.04                                           | 90.27  | 0.94            | 93.41              | 31.89           | 58.09  | 13.48 | 8.54  | 4.21 | 0.54 | 0.80 | 0.21 |
| Borgie et al. (2016)           | --                                              | --     | 79.07           | 209.00             | 43.95           | 57.29  | 13.05 | 15.59 | 1.15 | 1.09 | 1.31 | 0.20 |
| <b>Los Angeles, USA</b>        |                                                 |        |                 |                    |                 |        |       |       |      |      |      |      |
| Current study                  | 23.05                                           | 241.12 | 179.15          | 56.41              | 46.83           | 19.02  | 7.73  | 7.33  | 0.45 | 0.48 | 0.26 | 0.06 |
| Shirmohammadi et al. (2017)    | 30.00                                           | 230.00 | --              | --                 | --              | 4.09   | 3.85  | 10.41 | 0.45 | 0.59 | 0.58 | 0.05 |
| Habre et al. (2021)            | 59.84                                           | 190.76 | 53.53           | --                 | 24.80           | 3.80   | 3.56  | 5.88  | 0.44 | 0.38 | 0.26 | 0.10 |
| <b>Milan, Italy</b>            |                                                 |        |                 |                    |                 |        |       |       |      |      |      |      |
| Current study                  | 28.05                                           | 217.76 | 224.75          | 40.29              | 91.05           | 10.75  | 5.42  | 5.97  | 0.62 | 0.21 | 0.24 | 0.29 |
| Amato et al. (2016)            | 59.21                                           | 216.50 | 188.36          | 64.19              | 73.05           | 7.87   | 4.95  | 10.52 | 1.87 | 1.74 | 1.87 | 0.17 |
| <b>Riyadh, Saudi Arabia</b>    |                                                 |        |                 |                    |                 |        |       |       |      |      |      |      |
| Current study - dust events    | 6.71                                            | 34.62  | 20.73           | 37.37              | 2.67            | 134.40 | 58.54 | 39.45 | 0.22 | 0.43 | 0.08 | 0.05 |
| Current study - non-dust event | 23.00                                           | 76.55  | 40.45           | 77.97              | 8.33            | 160.76 | 40.05 | 28.17 | 2.16 | 0.54 | 0.22 | 0.19 |
| Alharbi et al. (2015)          | --                                              | --     | 16.32           | 33.29              | 13.79           | 133.66 | 24.24 | 21.99 | 0.31 | 0.48 | 0.35 | 0.02 |

## References

- Alharbi, B., Shareef, M.M. and Husain, T., 2015. Study of chemical characteristics of particulate matter concentrations in Riyadh, Saudi Arabia. *Atmospheric Pollution Research*, 6(1), pp.88-98.
- Amato, F., Alastuey, A., Karanasiou, A., Lucarelli, F., Nava, S., Calzolari, G., Severi, M., Becagli, S., Gianelle, V.L., Colombi, C. and Alves, C., 2016. AIRUSE-LIFE+: a harmonized PM speciation and source apportionment in five southern European cities. *Atmospheric Chemistry and Physics*, 16(5), pp.3289-3309.
- Borgie, M., Ledoux, F., Dagher, Z., Verdin, A., Cazier, F., Courcot, L., Shirali, P., Greige-Gerges, H. and Courcot, D., 2016. Chemical characteristics of PM<sub>2.5-0.3</sub> and PM<sub>0.3</sub> and consequence of a dust storm episode at an urban site in Lebanon. *Atmospheric Research*, 180, pp.274-286.
- Diapouli, E., Manousakas, M., Vratolis, S., Vasilatou, V., Maggos, T., Saraga, D., Grigoratos, T., Argyropoulos, G., Voutsas, D., Samara, C. and Eleftheriadis, K., 2017. Evolution of air pollution source contributions over one decade, derived by PM<sub>10</sub> and PM<sub>2.5</sub> source apportionment in two metropolitan urban areas in Greece. *Atmospheric environment*, 164, pp.416-430.
- Habre, R., Girguis, M., Urman, R., Fruin, S., Lurmann, F., Shafer, M., Gorski, P., Franklin, M., McConnell, R., Avol, E., Gilliland, F., 2021. Contribution of tailpipe and non-tailpipe traffic sources to quasi-ultrafine, fine and coarse particulate matter in southern California. *Journal of the Air and Waste Management Association* 71, 209–230.
- Shirmohammadi, F., Wang, D., Hasheminassab, S., Verma, V., Schauer, J.J., Shafer, M.M. and Sioutas, C., 2017. Oxidative potential of on-road fine particulate matter (PM<sub>2.5</sub>) measured on major freeways of Los Angeles, CA, and a 10-year comparison with earlier roadside studies. *Atmospheric Environment*, 148, pp.102-114.
- Taghvaei, S., Sowlat, M.H., Diapouli, E., Manousakas, M.I., Vasilatou, V., Eleftheriadis, K. and Sioutas, C., 2019. Source apportionment of the oxidative potential of fine ambient particulate matter (PM<sub>2.5</sub>) in Athens, Greece. *Science of The Total Environment*, 653,

pp.1407-1416.
